# Supplementary material
Source: publisher figshare collection journal article supplement (https://tandf.figshare.com/articles/dataset/_/9879275)
Supplement: Supplementary file 1 [file 1 › ibmk_a_1634764_sm8300.pdf]

**Supplementary Table 1. Quality assessments of the RCTs included in the study by using the Jadad scale**

| Items                                                | Xie 2013 | Notarangelo 2018 |
|------------------------------------------------------|----------|------------------|
| Was the study described as randomized?               | 1        | 1                |
| Was the method of randomization appropriate?         | 1        | 1                |
| Was the study described as blinded?                  | 0        | 1                |
| Was the method of blinding appropriate?              | 0        | 0                |
| Was there a description of withdrawals and dropouts? | 1        | 1                |
| Total                                                | 3        | 4                |

**Supplementary Table 2. Quality assessments of the Non-RCTs included in the study by using Newcastle-Ottawa Scale for cohort studies**

| Items                                                                    | Sánchez-Ramos 2016 | Shen 2016 | Ozawa 2018 |
|--------------------------------------------------------------------------|--------------------|-----------|------------|
| <b>Selection</b>                                                         |                    |           |            |
| Representativeness of the exposed cohort                                 | *                  | *         | *          |
| Selection of the non exposed cohort                                      |                    | *         | *          |
| Ascertainment of exposure                                                | *                  | *         | *          |
| Demonstration that outcome of interest was not present at start of study | *                  | *         | *          |
| <b>Comparability</b>                                                     |                    |           |            |
| Comparability of cohorts on the basis of the design or analysis          | *                  | *         | *          |
| <b>Outcome</b>                                                           |                    |           |            |
| Assessment of outcome                                                    | *                  | *         | *          |
| Was follow-up long enough for outcomes to occur                          | *                  | *         | *          |
| Adequacy of follow up of cohorts                                         | *                  | *         | *          |
| Total                                                                    | 7                  | 8         | 8          |

**Supplementary Table 3. The distribution of genotypes in Genotype-guided groups in included studies**

| Genotype   | Xie<br>2013<br>N=301 | Sánchez-Ramos<br>2016<br>N=719 | Notarangelo<br>2018<br>N=888 | Shen<br>2016<br>N=628 | Ozawa<br>2018<br>N=65 |
|------------|----------------------|--------------------------------|------------------------------|-----------------------|-----------------------|
| CYP2C19*2  |                      |                                |                              |                       |                       |
| *1/*1      | 47.5%                | 72.87%                         | 66.5%                        | 43%                   | 26.7%                 |
| *1/*2      | 37.9%                | 24.29%                         | 29.2%                        | 39.2%                 | 30.4%                 |
| *2/*2      | 5.3%                 | 2.84%                          | 4.3%                         | 9.1%                  | 4.3%                  |
| CYP2C19*3  |                      |                                | NA                           |                       |                       |
| *1/*1      |                      | 0                              |                              |                       |                       |
| *1/*3      | 4.7%                 | 0                              |                              | 5.8%                  | 13.0%                 |
| *3/*3      | 0.7%                 | 0                              |                              | 0.3%                  | 0%                    |
| *2/*3      | 4.0%                 | NA                             |                              | 2.6%                  | 17.4%                 |
| CYP2C19*17 | NA                   | NA                             |                              | NA                    | NA                    |
| *1/*1      |                      |                                | 60.9%                        |                       |                       |
| *1/*17     |                      |                                | 31.3%                        |                       |                       |
| *17/*17    |                      |                                | 7.8%                         |                       |                       |
| ABCB1      | NA                   |                                |                              | NA                    | NA                    |
| CC         |                      | 29.02%                         | 26.5%                        |                       |                       |
| CT         |                      | 51.42%                         | 47.1%                        |                       |                       |
| TT         |                      | 19.56%                         | 26.4%                        |                       |                       |

NA: Not Applicable

**Supplementary Table 4. The occurrences of events for each outcome in included studies**

|                       | Composite outcome<br>(G/C) |         | Death<br>(G/C) |        | MI<br>(G/C) |        | Stroke<br>(G/C) |       | Vessel revascularization<br>(G/C) |        | Bleeding events<br>(G/C) |        |
|-----------------------|----------------------------|---------|----------------|--------|-------------|--------|-----------------|-------|-----------------------------------|--------|--------------------------|--------|
| Xie 2013              | 8/301                      | 27/299  | 1/301          | 9/299  | 1/301       | 7/299  | 1/301           | 2/299 | 5/301                             | 9/299  | 4/301                    | 11/299 |
| Sánchez-Ramos<br>2016 | 32/317                     | 59/402  | 4/317          | 13/402 | 27/317      | 41/402 | 2/317           | 8/402 | 12/317                            | 22/402 | 13/317                   | 19/402 |
| Notarangelo<br>2018   | 71/448                     | 114/440 | 28/448         | 34/440 | 21/448      | 47/440 | 5/448           | 7/440 | NA                                | NA     | 17/448                   | 26/440 |
| Shen 2016             | 13/309                     | 30/319  | 4/309          | 8/319  | 5/309       | 13/319 | NA              | NA    | 4/309                             | 9/319  | 25/309                   | 19/319 |
| Ozawa 2018            | 1/24                       | 9/41    | 1/24           | 5/41   | 0/24        | 0/41   | 0/24            | 0/41  | 0/24                              | 3/41   | 0/24                     | 2/41   |

G: Genotype-guided group; C: Conventional treatment group; MI: Myocardial Infarction; NA: Not Applicable
